# Supplementary material for: Identification of key genes and pathways associated with cholangiocarcinoma development based on weighted gene correlation network analysis
Source: PubMed Central journal article supplement (PMC6825751; doi:10.7717/peerj.7968), 2019-10-31

### Scale independence

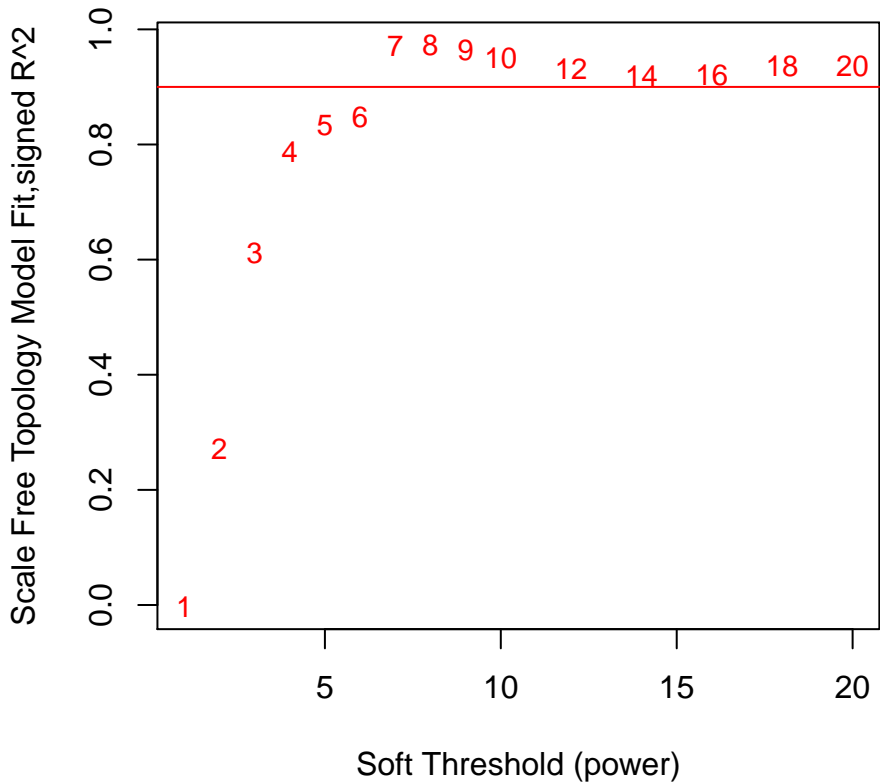

### Mean connectivity

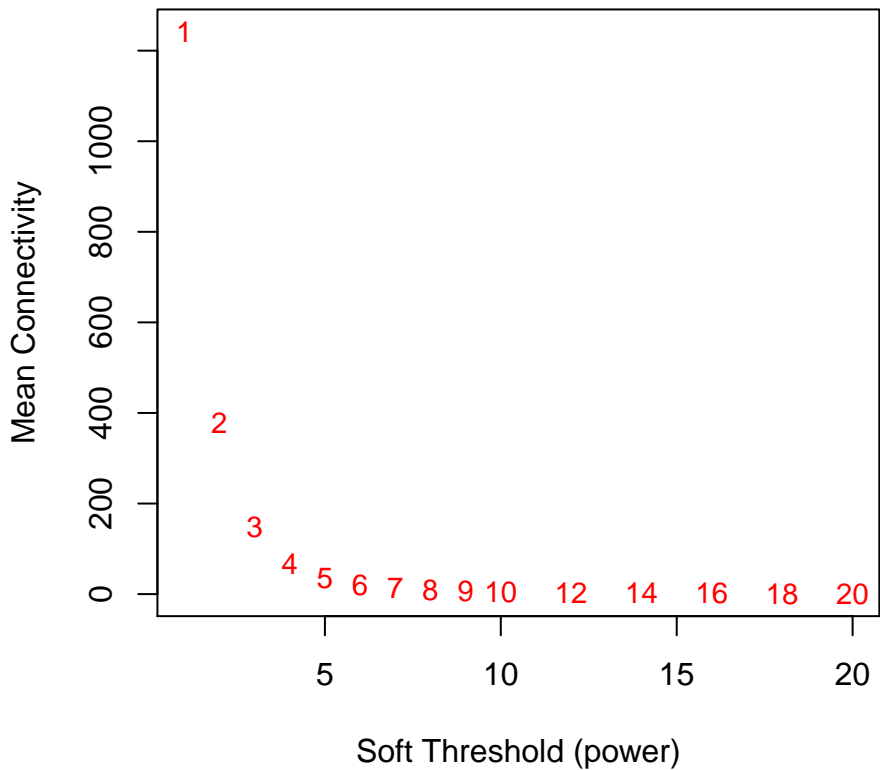

Supplement: peerj-07-7968-s001.pdf [file peerj-07-7968-s001.pdf]
