# Supplementary material for: Identification of key genes and pathways associated with cholangiocarcinoma development based on weighted gene correlation network analysis
Source: PeerJ. 2019 Oct 31;7:e7968. doi: 10.7717/peerj.7968 (PMC6825751; doi:10.7717/peerj.7968)
Supplement: Supplemental Information 2 [file peerj-07-7968-s002.xlsx]

## Sheet: go
ONTOLOGY	ID	Description	GeneRatio	BgRatio	pvalue	p.adjust	qvalue	geneID	Count	module
BP	GO:0003179	heart valve morphogenesis	5/181	36/17381	3.36222e-05	0.0340181	0.0296552	64220/56999/53834/4193/23462	5	tan
BP	GO:0006739	NADP metabolic process	5/181	36/17381	3.36222e-05	0.0340181	0.0296552	83594/5226/2539/4199/7086	5	tan
BP	GO:0003170	heart valve development	5/181	40/17381	5.67409e-05	0.0340181	0.0296552	64220/56999/53834/4193/23462	5	tan
BP	GO:0003281	ventricular septum development	6/181	65/17381	5.82548e-05	0.0340181	0.0296552	64220/53834/7481/6926/4193/23462	6	tan
BP	GO:0060411	cardiac septum morphogenesis	6/181	67/17381	6.91834e-05	0.0340181	0.0296552	4488/53834/7481/6926/4193/23462	6	tan
BP	GO:0003279	cardiac septum development	7/181	98/17381	7.36855e-05	0.0340181	0.0296552	64220/4488/53834/7481/6926/4193/23462	7	tan
BP	GO:0072537	fibroblast activation	3/181	10/17381	0.000126306	0.046027	0.0401239	2729/28984/2730	3	tan
BP	GO:0001101	response to acid chemical	12/181	324/17381	0.000153793	0.046027	0.0401239	5743/2729/1019/7481/948/2730/1244/7483/10626/11211/3383/53335	12	tan
BP	GO:0016055	Wnt signaling pathway	15/181	481/17381	0.000158835	0.046027	0.0401239	11197/6657/9096/4041/57447/59352/51704/147111/9620/7481/54894/8313/7483/11211/85407	15	tan
BP	GO:0198738	cell-cell signaling by wnt	15/181	483/17381	0.000166163	0.046027	0.0401239	11197/6657/9096/4041/57447/59352/51704/147111/9620/7481/54894/8313/7483/11211/85407	15	tan
BP	GO:0045665	negative regulation of neuron differentiation	9/181	193/17381	0.000193858	0.0476991	0.0415815	11202/6657/9423/2048/4193/30812/23105/53335/25791	9	tan
BP	GO:0010721	negative regulation of cell development	11/181	288/17381	0.00022253	0.0476991	0.0415815	11202/6657/430/9423/2048/2539/4193/30812/23105/53335/25791	11	tan
BP	GO:0046660	female sex differentiation	7/181	117/17381	0.000223859	0.0476991	0.0415815	64220/3643/3815/1299/6926/57122/3383	7	tan
BP	GO:0007586	digestion	16/148	168/17381	1.02329e-12	2.73834e-09	2.43436e-09	5406/10753/5319/5645/6750/7033/7031/388743/340547/440387/7032/1504/79924/10136/6343/5644	16	salmon
BP	GO:0010817	regulation of hormone levels	22/148	486/17381	1.531e-10	2.04848e-07	1.82108e-07	56605/6833/28231/3630/6447/169026/2641/9254/195814/415116/133308/55512/8600/10170/114899/6469/27284/1734/6343/6783/5530/7425	22	salmon
BP	GO:0009914	hormone transport	15/148	312/17381	7.10266e-08	6.33557e-05	5.63229e-05	6833/28231/3630/6447/169026/2641/9254/415116/133308/55512/8600/114899/6343/5530/7425	15	salmon
BP	GO:0046879	hormone secretion	14/148	300/17381	2.84972e-07	0.000190647	0.000169484	6833/3630/6447/169026/2641/9254/415116/133308/55512/8600/114899/6343/5530/7425	14	salmon
BP	GO:0023061	signal release	16/148	421/17381	6.22033e-07	0.000332912	0.000295957	6833/7476/3630/84958/6447/169026/2641/9254/415116/133308/55512/8600/114899/6343/5530/7425	16	salmon
BP	GO:0030072	peptide hormone secretion	12/148	243/17381	1.15828e-06	0.000516595	0.000459249	6833/3630/169026/2641/9254/415116/133308/55512/8600/6343/5530/7425	12	salmon
BP	GO:0046883	regulation of hormone secretion	12/148	254/17381	1.84132e-06	0.000691567	0.000614798	6833/3630/6447/169026/2641/9254/415116/133308/8600/114899/6343/5530	12	salmon
BP	GO:0050679	positive regulation of epithelial cell proliferation	10/148	171/17381	2.06746e-06	0.000691567	0.000614798	7476/54959/2152/1960/652/7857/7060/1001/6469/5068	10	salmon
BP	GO:0090276	regulation of peptide hormone secretion	10/148	201/17381	8.728e-06	0.00259512	0.00230705	6833/3630/169026/2641/9254/415116/133308/8600/6343/5530	10	salmon
BP	GO:0050673	epithelial cell proliferation	13/148	361/17381	1.31865e-05	0.0035287	0.00313699	7476/54959/2152/1960/652/7857/7060/1001/1969/195814/8600/6469/5068	13	salmon
BP	GO:2001204	regulation of osteoclast development	3/148	11/17381	9.49478e-05	0.0195413	0.0173721	51208/133308/8600	3	salmon
BP	GO:0035116	embryonic hindlimb morphogenesis	4/148	29/17381	0.000101582	0.0195413	0.0173721	7476/5307/652/6469	4	salmon
BP	GO:0060326	cell chemotaxis	10/148	270/17381	0.000107593	0.0195413	0.0173721	9547/5319/1960/7857/7060/4681/1969/79148/8600/1113	10	salmon
BP	GO:0033500	carbohydrate homeostasis	9/148	219/17381	0.000109537	0.0195413	0.0173721	56605/6833/3630/5468/2641/415116/133308/5530/7425	9	salmon
BP	GO:0042593	glucose homeostasis	9/148	219/17381	0.000109537	0.0195413	0.0173721	56605/6833/3630/5468/2641/415116/133308/5530/7425	9	salmon
BP	GO:0002791	regulation of peptide secretion	13/148	448/17381	0.000121127	0.0202585	0.0180097	6833/5319/3630/169026/2641/9254/415116/133308/8600/114899/7850/6343/5530	13	salmon
BP	GO:0032102	negative regulation of response to external stimulus	10/148	282/17381	0.000153534	0.0241681	0.0214853	6833/2043/3630/5468/4681/5055/79148/114899/7850/347	10	salmon
BP	GO:0001525	angiogenesis	13/148	469/17381	0.00019014	0.0282675	0.0251297	6833/7476/2152/1960/652/7857/7060/9394/5468/1969/6469/79924/347	13	salmon
BP	GO:0042445	hormone metabolic process	8/148	192/17381	0.000241718	0.0340441	0.0302649	56605/6447/195814/10170/6469/27284/1734/6783	8	salmon
BP	GO:0035137	hindlimb morphogenesis	4/148	37/17381	0.000267931	0.0358491	0.0318697	7476/5307/652/6469	4	salmon
BP	GO:0050678	regulation of epithelial cell proliferation	10/148	307/17381	0.000303819	0.0379903	0.0337731	7476/54959/2152/1960/652/7857/7060/1001/6469/5068	10	salmon
BP	GO:0030322	stabilization of membrane potential	3/148	16/17381	0.000312326	0.0379903	0.0337731	3777/3775/9424	3	salmon
BP	GO:0030073	insulin secretion	8/148	203/17381	0.000351868	0.0392333	0.0348781	6833/169026/2641/9254/415116/133308/5530/7425	8	salmon
BP	GO:0030595	leukocyte chemotaxis	8/148	203/17381	0.000351868	0.0392333	0.0348781	9547/5319/7857/7060/4681/79148/8600/1113	8	salmon
BP	GO:0036035	osteoclast development	3/148	17/17381	0.000376892	0.0403425	0.0358642	51208/133308/8600	3	salmon
BP	GO:0051048	negative regulation of secretion	8/148	210/17381	0.000441147	0.0454042	0.040364	6833/3630/415116/114899/7850/6343/1113/5530	8	salmon
CC	GO:0005788	endoplasmic reticulum lumen	12/152	299/18511	6.87594e-06	0.00142332	0.00138243	4148/7476/29106/652/3630/7857/1301/2641/1114/6469/1308/7425	12	salmon
CC	GO:0005578	proteinaceous extracellular matrix	12/152	365/18511	4.93834e-05	0.00511119	0.00496434	4148/7476/10321/652/7060/7033/1301/8076/57633/79148/6469/1308	12	salmon
MF	GO:0048018	receptor ligand activity	19/143	456/17354	6.75424e-09	2.34372e-06	2.03338e-06	7476/9547/652/3630/7857/7060/6750/4681/7031/3777/2641/5967/8600/1114/10435/6469/79924/6343/7425	19	salmon
MF	GO:0030545	receptor regulator activity	19/143	485/17354	1.82431e-08	3.16517e-06	2.74606e-06	7476/9547/652/3630/7857/7060/6750/4681/7031/3777/2641/5967/8600/1114/10435/6469/79924/6343/7425	19	salmon
MF	GO:0005179	hormone activity	7/143	121/17354	6.4278e-05	0.00743482	0.00645035	3630/6750/2641/1114/79924/6343/7425	7	salmon
MF	GO:0022841	potassium ion leak channel activity	3/143	16/17354	0.000283604	0.0246027	0.021345	3777/3775/9424	3	salmon
MF	GO:0022840	leak channel activity	3/143	19/17354	0.000481926	0.0278714	0.0241809	3777/3775/9424	3	salmon
MF	GO:0022842	narrow pore channel activity	3/143	19/17354	0.000481926	0.0278714	0.0241809	3777/3775/9424	3	salmon
MF	GO:0005242	inward rectifier potassium channel activity	3/143	21/17354	0.000653534	0.0323966	0.0281069	6833/3775/9424	3	salmon
MF	GO:0004252	serine-type endopeptidase activity	8/143	244/17354	0.000948723	0.0411509	0.0357019	5655/2152/23436/5645/440387/1504/10136/5644	8	salmon
MF	GO:0004181	metallocarboxypeptidase activity	3/143	26/17354	0.00123967	0.0477961	0.0414673	1357/1360/1358	3	salmon
