# Supplementary material for: Identification of key genes and pathways associated with cholangiocarcinoma development based on weighted gene correlation network analysis
Source: PeerJ. 2019 Oct 31;7:e7968. doi: 10.7717/peerj.7968 (PMC6825751; doi:10.7717/peerj.7968)
Supplement: Supplemental Information 3 [file peerj-07-7968-s003.xlsx]

## Sheet: coxres
	P value	HR	Lower limit	Upper limit
KRAS	0.98276	1.01	0.398414	2.56042
TP53	0.388608	0.669499	0.265681	1.68709
BAP1	0.99103	1.00518	0.396611	2.54753
OGG1	0.446785	0.702211	0.278433	1.77098
XPC	0.0477769	0.368545	0.146264	0.928629
ERCC2	0.837532	1.09949	0.431368	2.80242
ERCC1	0.615265	0.790366	0.31204	2.00192
XRCC1	0.0957813	0.458697	0.181925	1.15653
XRCC2	0.17795	1.85816	0.735214	4.69628
XRCC3	0.364902	1.50589	0.586268	3.86801
XRCC4	0.148629	0.506248	0.199745	1.28307
MSH2	0.710903	1.1848	0.468749	2.99466
MSH3	0.731611	1.17021	0.463194	2.9564
MSH6	0.794818	0.884408	0.350661	2.23058
RAD51	0.64163	0.804268	0.317511	2.03724
PDCD1	0.503197	0.737659	0.292594	1.85971
CD274	0.611663	0.788568	0.311365	1.99714
CTLA4	0.638882	0.808682	0.321005	2.03725
HAVCR2	0.199772	0.544058	0.215354	1.37448
LAG3	0.366397	0.659206	0.261637	1.6609
CD28	0.0446216	0.363785	0.144354	0.916771
CD80	0.712058	0.844821	0.33524	2.12899
CD86	0.298635	0.608628	0.241542	1.5336
